# Supplementary material
Source: publisher figshare collection journal article supplement (https://tandf.figshare.com/articles/dataset/_/17951637)
Supplement: Supplementary file 1 [file 1]

**Supplementary Table 1**

Geographic coordinates in degrees, minutes and seconds (WGS84); elevations (in meters), sampled habitats, locality and survey dates of each sampling point of this study. Dates are in day/month/year format.

| Code | Coordinates   |               | Elevation<br>(m) | Habitat                                        | Locality        | Survey Dates (Season)                |
|------|---------------|---------------|------------------|------------------------------------------------|-----------------|--------------------------------------|
|      | Lat y         | Long x        |                  |                                                |                 |                                      |
| 1    | 22° 50' 37" S | 45° 30' 57" W | 718              | Large water body inside<br>vegetation (border) | Pindamonhangaba | 16/03/2016 (Wet)<br>11/06/2016 (Dry) |
| 2    | 22° 50' 11" S | 45° 31' 24" W | 787              | Large trail inside vegetation<br>(border)      | Pindamonhangaba | 18/03/2016 (Wet)<br>12/06/2016 (Dry) |
| 3    | 22° 36' 01" S | 45° 13' 16" W | 892              | Large trail inside vegetation<br>(border)      | Piquete         | 22/03/2016 (Wet)<br>20/04/2017 (Dry) |
| 4    | 22° 49' 36" S | 45° 31' 34" W | 966              | Regenerating gap in vegetation<br>(border)     | Pindamonhangaba | 20/03/2017 (Wet)<br>16/08/2016 (Dry) |

|    |               |               |      |                                                     |                         |                                      |
|----|---------------|---------------|------|-----------------------------------------------------|-------------------------|--------------------------------------|
| 5  | 22° 35' 39" S | 45° 13' 50" W | 1002 | Small water body inside<br>vegetation (cluttered)   | Piquete                 | 18/10/2016 (Wet)<br>21/04/2017 (Dry) |
| 6  | 22° 49' 26" S | 45° 31' 35" W | 1089 | Small trail inside vegetation<br>(cluttered)        | Pindamonhangaba         | 21/03/2017 (Wet)<br>15/08/2016 (Dry) |
| 7  | 22° 48' 20" S | 45° 38' 05" W | 1208 | Pavement road next to vegetation<br>fragment (open) | Santo Antônio do Pinhal | 14/12/2016 (Wet)<br>25/04/2017 (Dry) |
| 8  | 22° 48' 17" S | 45° 37' 33" W | 1332 | Open area next to vegetation<br>fragment (open)     | Santo Antônio do Pinhal | 07/12/2016 (Wet)<br>16/06/2016 (Dry) |
| 9  | 22° 48' 20" S | 45° 37' 17" W | 1424 | Small water body inside<br>vegetation (cluttered)   | Santo Antônio do Pinhal | 10/12/2016 (Wet)<br>18/08/2016 (Dry) |
| 10 | 22° 48' 13" S | 45° 37' 01" W | 1607 | Small trail inside vegetation<br>(cluttered)        | Santo Antônio do Pinhal | 11/12/2016 (Wet)<br>23/04/2017 (Dry) |
