# Supplementary material
Source: publisher figshare collection journal article supplement (https://tandf.figshare.com/articles/dataset/_/17951637)
Supplement: Supplementary file 2 [file 1]

## Supplementary Table 2

Compiled list of bat species occurring at São Paulo state (Garbino, 2016; Cláudio et al., 2020).

| Species                                       |
|-----------------------------------------------|
| <b>Family Emballonuridae</b> Gervais, 1855    |
| <b>Subfamily Emballonurinae</b> Gervais, 1855 |
| <i>Diclidurus</i> Wied-Neuwied, 1819          |
| <i>D. scutatus</i> Peters, 1869               |
| <i>Peropteryx</i> Peters, 1867                |
| <i>P. kappleri</i> Peters, 1867               |
| <i>P. macrotis</i> (Wagner, 1843)             |
| <i>Saccopteryx</i> Illiger, 1811              |
| <i>S. leptura</i> (Schreber, 1774)            |
| <b>Family Noctilionidae</b> Gray, 1821        |
| <i>Noctilio</i> Linnaeus, 1766                |
| <i>N. albiventris</i> Desmarest, 1818         |
| <i>N. leporinus</i> (Linnaeus, 1758)          |
| <b>Family Phyllostomidae</b> Gray, 1825       |
| <b>Subfamily Phyllostominae</b> Gray, 1825    |
| <i>Chrotopterus</i> Peters, 1865              |
| <i>C. auritus</i> (Peters, 1856)              |
| <i>Glyphonycteris</i> Thomas, 1896            |
| <i>G. sylvestris</i> Thomas, 1896             |
| <i>Lamproncycteris</i> Sanborn, 1949          |
| <i>L. brachyotis</i> (Dobson, 1879)           |
| <i>Lonchorhina</i> Tomes, 1863                |

|                                                  |
|--------------------------------------------------|
| <i>L. aurita</i> Tomes, 1863                     |
| <i>Macrophyllum</i> Gray, 1838                   |
| <i>M. macrophyllum</i> (Schinz, 1821)            |
| <i>Micronycteris</i> Gray, 1866                  |
| <i>Micronycteris</i> sp.                         |
| <i>M. megalotis</i> (Gray, 1842)                 |
| <i>M. microtis</i> Miller, 1898                  |
| <i>M. schmidtorum</i> Sanborn, 1935              |
| <i>Mimon</i> Gray, 1847                          |
| <i>M. bennettii</i> (Gray, 1838)                 |
| <i>Phylloderma</i> Peters, 1865                  |
| <i>P. stenops</i> Peters, 1865                   |
| <i>Phyllostomus</i> Lacépède, 1799               |
| <i>P. discolor</i> (J.A. Wagner, 1843)           |
| <i>P. hastatus</i> (Pallas, 1767)                |
| <i>Tonatia</i> Gray, 1827                        |
| <i>T. bidens</i> (Spix, 1823)                    |
| <i>Trachops</i> Gray, 1827                       |
| <i>T. cirrhosus</i> (Spix, 1823)                 |
| <b>Subfamily Glossophaginae</b> Bonaparte, 1845  |
| <i>Anoura</i> Gray, 1838                         |
| <i>A. caudifer</i> (É. Geoffroy, 1818)           |
| <i>A. geoffroyi</i> Gray, 1838                   |
| <i>Glossophaga</i> É. Geoffroy, 1818             |
| <i>G. soricina</i> (Pallas, 1766)                |
| <b>Subfamily Lonchophyllinae</b> Griffiths, 1982 |
| <i>Lonchophylla</i> Thomas, 1903                 |

|                                                      |
|------------------------------------------------------|
| <i>L. peracchii</i> Dias, Esbérard & Moratelli, 2013 |
| <b>Subfamily Carolliinae</b> Miller, 1924            |
| <i>Carollia</i> Gray, 1838                           |
| <i>C. perspicillata</i> (Linnaeus, 1758)             |
| <b>Subfamily Stenodermatinae</b> Gervais, 1856       |
| <i>Artibeus</i> Leach, 1821                          |
| <i>A. cinereus</i> (Gervais, 1856)                   |
| <i>A. fimbriatus</i> Gray, 1838                      |
| <i>A. lituratus</i> (Olfers, 1818)                   |
| <i>A. obscurus</i> (Schinz, 1821)                    |
| <i>A. planirostris</i> (Spix, 1823)                  |
| <i>Chiroderma</i> Peters, 1860                       |
| <i>C. doriae</i> Thomas, 1861                        |
| <i>C. villosum</i> Peters, 1860                      |
| <i>Platyrrhinus</i> Saussure, 1860                   |
| <i>P. incarum</i> (Thomas, 1912)                     |
| <i>P. lineatus</i> (É. Geoffroy, 1810)               |
| <i>P. recifinus</i> (Thomas, 1901)                   |
| <i>Vampyressa</i> Thomas, 1900                       |
| <i>V. pusilla</i> (Wagner, 1843)                     |
| <i>Vampyrodes</i> Thomas, 1900                       |
| <i>V. caraccioli</i> (Thomas, 1889)                  |
| <i>Pygoderma</i> Peters, 1863                        |
| <i>P. bilabiatum</i> (Wagner, 1843)                  |
| <i>Sturnira</i> Gray, 1842                           |
| <i>S. lilium</i> (É. Geoffroy, 1810)                 |
| <i>S. tildae</i> de la Torre, 1959                   |

|                                                |
|------------------------------------------------|
| <b>Subfamily Desmodontinae</b> Bonaparte, 1845 |
| <i>Desmodus</i> Wied-Neuwied, 1826             |
| <i>D. rotundus</i> (É. Geoffroy, 1810)         |
| <i>Diaemus</i> Miller, 1906                    |
| <i>D. youngii</i> (Jentink, 1893)              |
| <i>Diphylla</i> Spix, 1823                     |
| <i>D. ecaudata</i> Spix, 1823                  |
| <b>Family Furipteridae</b> Gray, 1866          |
| <i>Furipterus</i> Bonaparte, 1837              |
| <i>F. horrens</i> (Cuvier, 1828)               |
| <b>Family Natalidae</b> Gray, 1866             |
| <i>Natalus</i> Gray, 1838                      |
| <i>N. macrourus</i> (Gervais, 1856)            |
| <b>Family Thyropteridae</b> Miller, 1907       |
| <i>Thyroptera</i> Spix, 1823                   |
| <i>T. tricolor</i> Spix, 1823                  |
| <b>Family Molossidae</b> Gervais, 1856         |
| <b>Subfamily Molossinae</b> Gervais, 1856      |
| <i>Cynomops</i> Thomas, 1920                   |
| <i>C. abrasus</i> (Temminck, 1826)             |
| <i>C. planirostris</i> (Peters, 1866)          |
| <i>Eumops</i> Miller, 1906                     |
| <i>E. auripendulus</i> (Shaw, 1800)            |
| <i>E. bonariensis</i> (Peters, 1874)           |
| <i>E. glaucinus</i> (Wagner, 1843)             |
| <i>E. hansae</i> Sanborn, 1932                 |
| <i>E. maurus</i> (Thomas, 1901)                |

|                                                    |
|----------------------------------------------------|
| <i>E. perotis</i> (Schinz, 1821)                   |
| <i>Molossops</i> Peters, 1866                      |
| <i>M. neglectus</i> Williams & Genoways, 1980      |
| <i>M. temminckii</i> (Burmeister, 1854)            |
| <i>Molossus</i> É. Geoffroy, 1805                  |
| <i>M. aztecus</i> Sausurre, 1860                   |
| <i>M. currentium</i> Thomas, 1901                  |
| <i>M. molossus</i> (Pallas, 1766)                  |
| <i>M. rufus</i> É. Geoffroy, 1805                  |
| <i>Nyctinomops</i> Miller, 1902                    |
| <i>N. aurispinosus</i> (Peale, 1848)               |
| <i>N. laticaudatus</i> (É. Geoffroy, 1805)         |
| <i>N. macrotis</i> (Gray, 1839)                    |
| <i>Promops</i> Gervais, 1856                       |
| <i>P. nasutus</i> (Spix, 1823)                     |
| <i>Tadarida</i> Rafinesque, 1814                   |
| <i>T. brasiliensis</i> (I. Geoffroy, 1824)         |
| <b>Family Vespertilionidae</b> Gray, 1821          |
| <b>Subfamily Vespertilioninae</b> Gray, 1821       |
| <i>Eptesicus</i> Rafinesque, 1820                  |
| <i>E. brasiliensis</i> (Desmarest, 1819)           |
| <i>E. diminutus</i> Osgood, 1915                   |
| <i>E. furinalis</i> (d'Orbigny & Gervais, 1847)    |
| <i>E. taddeii</i> Miranda, Bernardi & Passos, 2006 |
| <i>Histiotus</i> Gervais, 1856                     |
| <i>H. montanus</i> (Philippi & Landbeck, 1861)     |
| <i>H. velatus</i> (I. Geoffroy, 1824)              |

|                                         |
|-----------------------------------------|
| <i>Lasiurus</i> Gray, 1831              |
| <i>L. blossevillii</i> ([Lesson, 1826]) |
| <i>L. cinereus</i> (Beauvois, 1796)     |
| <i>L. ebenus</i> Fazzolari-Corrêa, 1994 |
| <i>L. ega</i> (Gervais, 1856)           |
| <b>Subfamily Myotinae</b> Tate, 1942    |
| <i>Myotis</i> Kaup, 1829                |
| <i>M. albescens</i> (É. Geoffroy, 1806) |
| <i>M. levis</i> (I. Geoffroy, 1824)     |
| <i>M. nigricans</i> (Schinz, 1821)      |
| <i>M. riparius</i> Handley, 1960        |
| <i>M. ruber</i> (É. Geoffroy, 1806)     |
